# Supplementary material for: An Improved Method of Theabrownins Extraction and Detection in Six Major Types of Tea (Camellia sinensis)
Source: Hindawi journal article supplement (doi:10.1155/2022/8581515), 2022-09-27
Supplement: f1 [file 8581515.f1.doc]

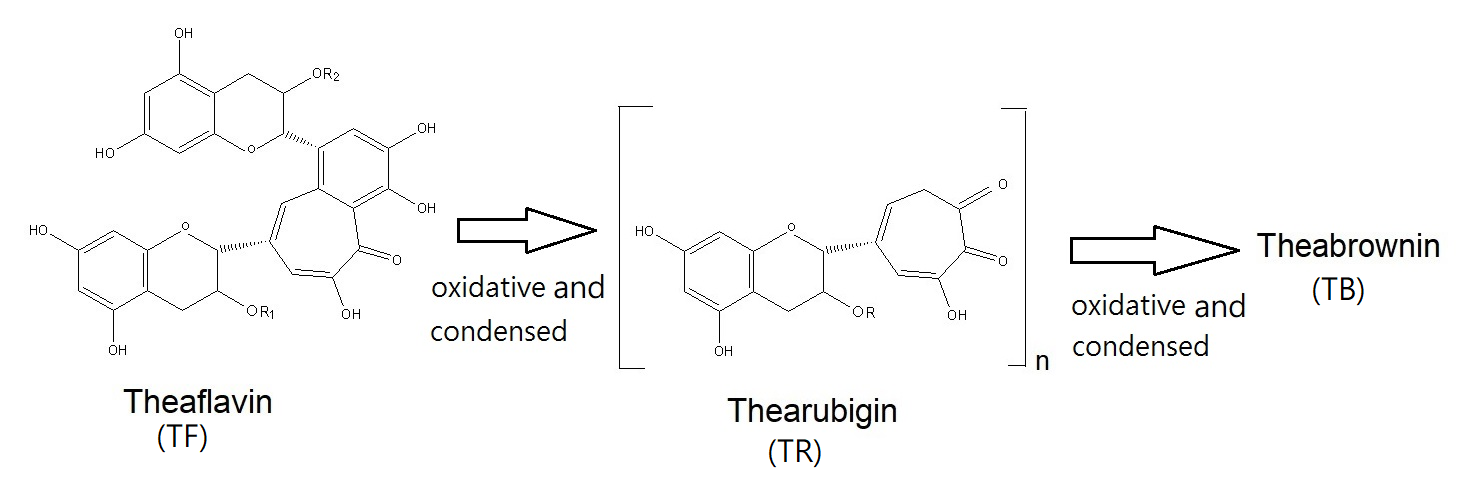


Supplementary Figure 1. Simplified scheme of relationship among TF, TR, and TB. There are more than 20 identified types of TF, among them, TF (R1, R2=H), theaflavin-3-gallate (R1= gallate, R2=H), theaflain-3’-gallate (R1=H, R2= gallate), and theaflavin-3,3’-digallate (R1, R2= gallate) are major structures [53]. TBs are heterogeneous macromolecules that polymerized, condensed, and oxidized from catechins, TFs, and TRs with proteins, lipids, and polysaccharides [9, 48].
